# Supplementary material
Source: publisher figshare collection journal article supplement (https://acs.figshare.com/ndownloader/files/4501276)
Supplement: Supplementary file 1 [file 4501276]

**Steric and Electronic Effects of Carbene Substitution in Grubbs' First-  
Generation Catalyst**

David R. Lane, Christine M. Beavers, Marilyn M. Olmstead and Neil E. Schore\*

*Department of Chemistry, University of California, Davis, California 95616 USA*

SUPPORTING INFORMATION

---

\*Corresponding author. E-mail: schore@chem.ucdavis.edu

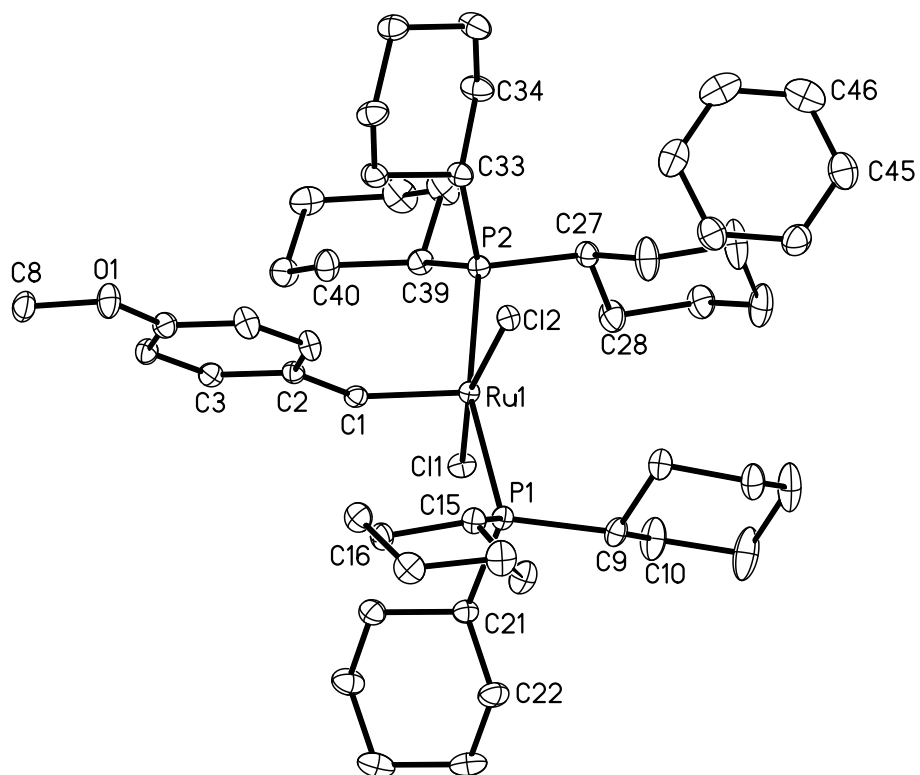

Figure S1. The structure of bis(tricyclohexylphosphino)dichloro-[(4-methoxyphenyl)methylidene]ruthenium(II) benzene solvate. Thermal ellipsoids are shown at the 50% probability level. H atoms are omitted for clarity.

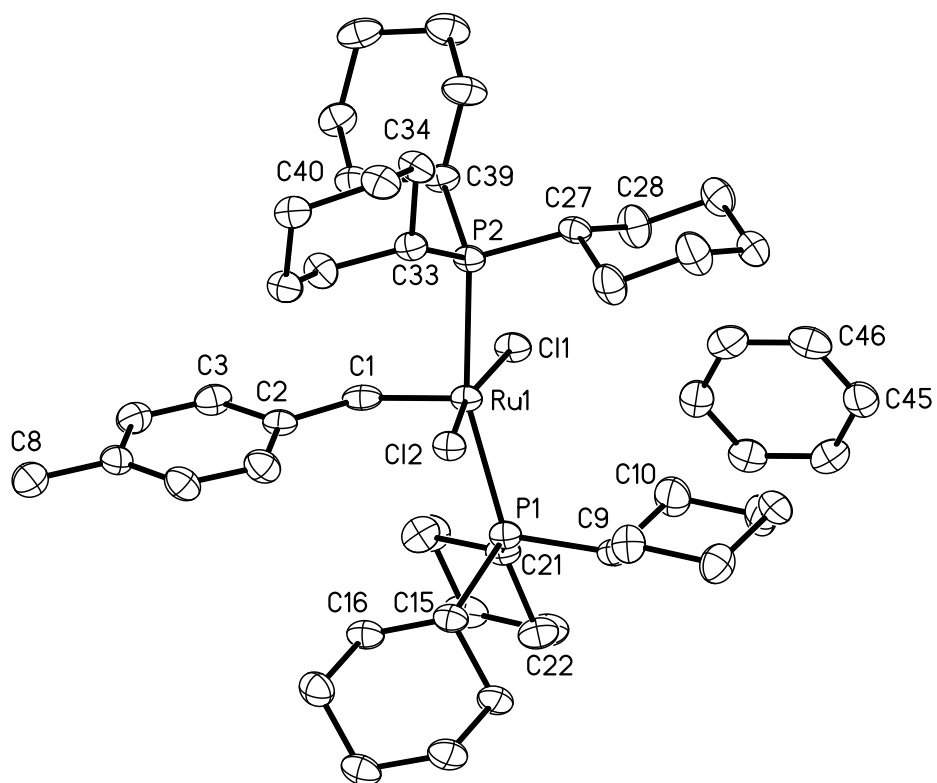

Figure S2. The structure of bis(tricyclohexylphosphino)dichloro-[(4-methylphenyl)methylidene]ruthenium(II) benzene solvate. Thermal ellipsoids are shown at the 50% probability level. H atoms are omitted for clarity.

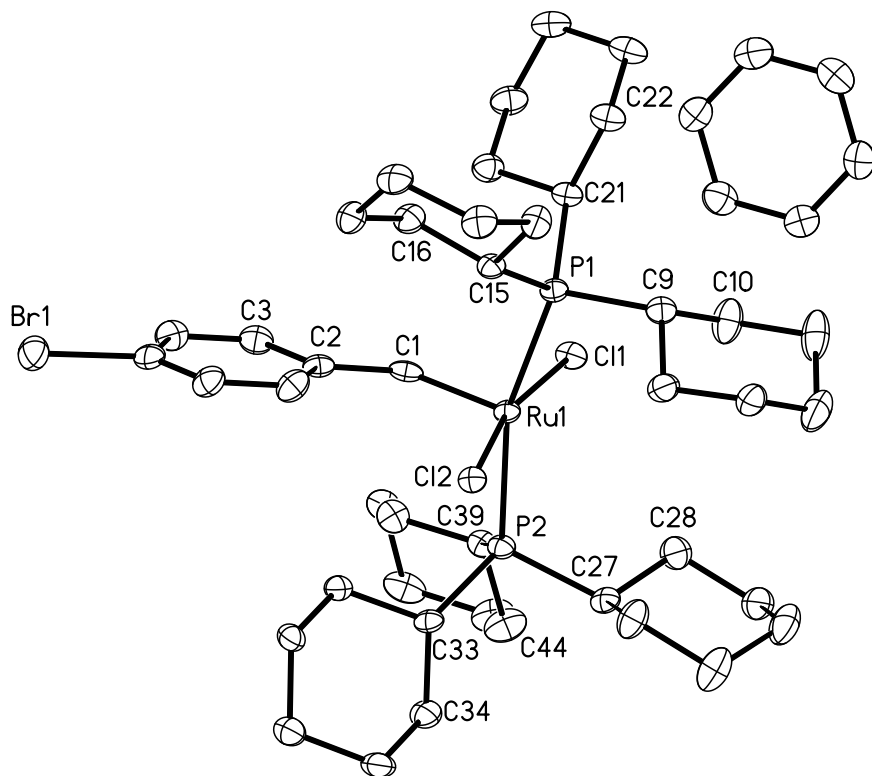

Figure S3. The structure of bis(tricyclohexylphosphino)dichloro-[(4-bromophenyl)methylidene]ruthenium(II) benzene solvate. Thermal ellipsoids are shown at the 50% probability level. H atoms are omitted for clarity.

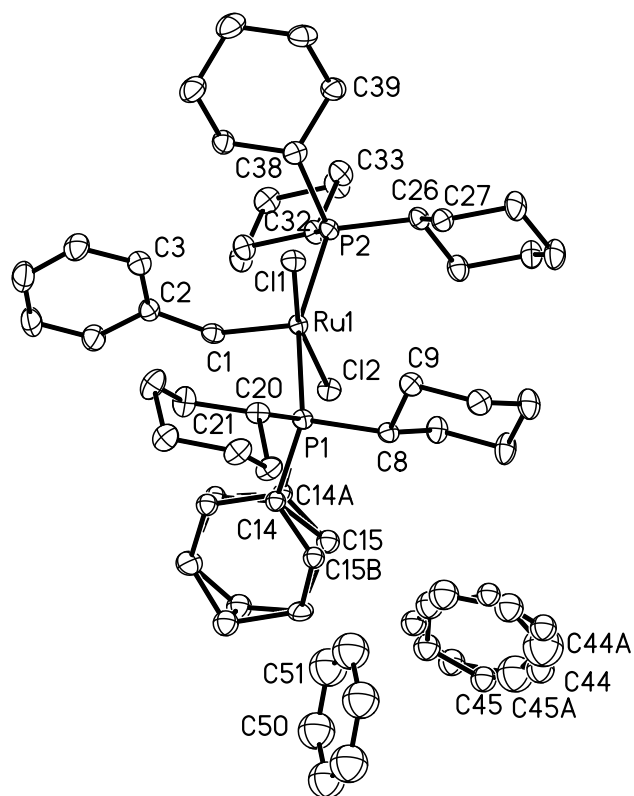

Figure S5. The structure of bis(tricyclohexylphosphino)dichloro-(benzylidene)ruthenium(II) benzene sesquisolvate. Thermal ellipsoids are shown at the 50% probability level. H atoms are omitted for clarity.
